# Supplementary material for: Effects of reactive social distancing on the 1918 influenza pandemic
Source: PubMed Central journal article supplement (PMC5507503; doi:10.1371/journal.pone.0180545), 2017-07-12
Supplement: pone.0180545.s001.pdf [file pone.0180545.s001.pdf]

## S1 Likelihood-based inference framework

The weekly reported mortality cases are obtained as

$$Z_i = \int_{t_i}^{t_{i+1}} \phi \gamma_{h1} I_{h1} dt \quad (1)$$

where  $\phi$  denotes the case-fatality ratio. We assume that the weekly observed mortality cases  $C_i$  is a random sample from a Negative-binomial (NB) distribution

$$C_i \sim \text{NB} \left( n = \frac{1}{\tau}, p = \frac{1}{1 + Z_i \tau} \right) \quad (2)$$

where  $n$  and  $p$  denote the size and probability of the NB distribution, and  $\tau$  denotes an over-dispersion parameter which will be estimated.

The following likelihood function is for one administrative unit

$$L(\theta_1 | C_{1,\dots,N}) = \prod_{i=1}^N l_i \quad (3)$$

where  $\theta_1$  denotes the parameter vector,  $l_i$  is the weekly density associated with  $C_i$  and  $Z_i$ , and  $N$  denotes the number of weeks. This function is then applied to three cities: London boroughs, Birmingham and Liverpool, and the overall likelihood is

$$L_{\text{overall}} = \prod_{j=1}^3 L_j \quad (4)$$

We use iterated filtering based plug-and-play inference framework [1–7] to estimate  $\theta_1$  via maximizing  $L_{\text{overall}}$ .

## References

- [1] He D, Ionides EL, King AA. Plug-and-play inference for disease dynamics: measles in large and small populations as a case study. *J R Soc Interface*. 2010; 7:271-83.
- [2] Ionides EL, Bretó C, King AA. Inference for nonlinear dynamical systems. *Proc Natl Acad Sci U S A*. 2006; 103:18438-43.
- [3] Ionides EL, Bhadra A, King AA. Iterated Filtering. *Ann Stat*. 2011; 39:1776-802.
- [4] He D, Dushoff J, Day T, Ma J, Earn DJD. Mechanistic modelling of the three waves of the 1918 influenza pandemic. *Theor. Ecol*. 2011; 4:283-8.
- [5] Camacho A, Ballesteros S, Graham AL, Carrat F, Ratmann O, Cazelles B. Explaining rapid reinfections in multiple-wave influenza outbreaks: Tristan da Cunha 1971 epidemic as a case study. *Proc Biol Sci*. 2011; 278:3635-43.
- [6] Earn DJ, He D, Loeb MB, Fonseca K, Lee BE, Dushoff J. Effects of school closure on incidence of pandemic influenza in Alberta, Canada. *Ann Intern Med*. 2012; 156:173-81.
- [7] King AA, Ionides EL, Pascual M, Bouma MJ. Inapparent infections and cholera dynamics. *Nature*. 2008; 454:877-80.
