# Supplementary material for: Effects of reactive social distancing on the 1918 influenza pandemic
Source: PubMed Central journal article supplement (PMC5507503; doi:10.1371/journal.pone.0180545), 2017-07-12

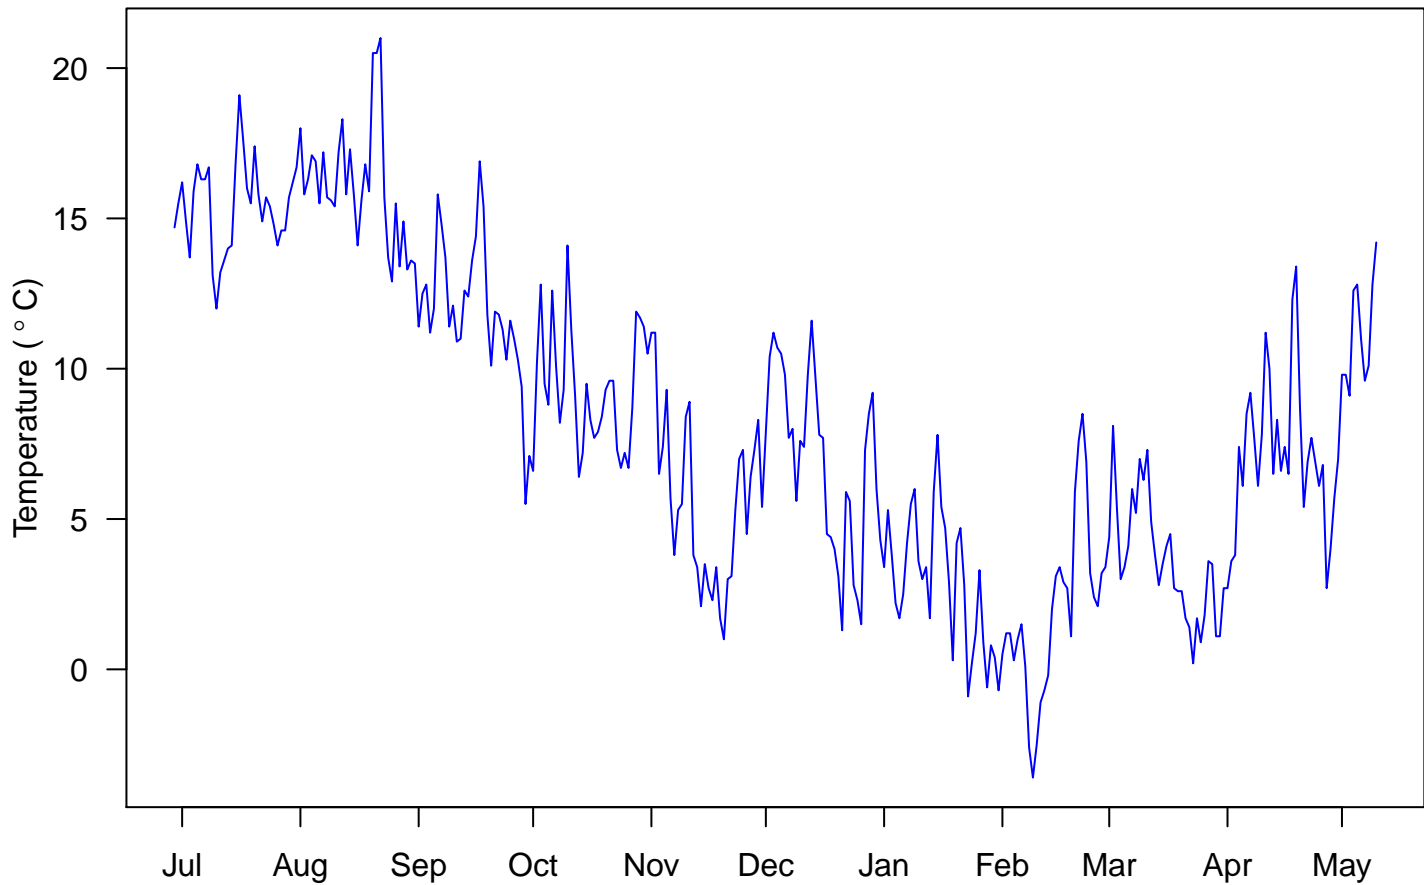

Supplement: pone.0180545.s002.pdf [file pone.0180545.s002.pdf]
